# Supplementary material for: Cross-sectional study comparing cognitive function in treatment responsive versus treatment non-responsive schizophrenia: evidence from the STRATA study
Source: PubMed Central journal article supplement (PMC8627394; doi:10.1136/bmjopen-2021-054160), 2021-11-25
Supplement: bmjopen-2021-054160supp002.pdf [file bmjopen-2021-054160supp002.pdf]

**Supplementary material****Table S.1***Univariable and multivariable linear regression models for response status and BACS performance*

| BACS measure      | R  | NR | Unadjusted |      |                 |         | Adjusted for age, gender, illness duration and anticholinergic effects |      |                 |         | Adjusted for anticholinergic effects |      |                 |         |
|-------------------|----|----|------------|------|-----------------|---------|------------------------------------------------------------------------|------|-----------------|---------|--------------------------------------|------|-----------------|---------|
|                   | N  | N  | $\beta$    | SE   | 95%CI           | P-value | $\beta$                                                                | SE   | 95%CI           | P-value | $\beta$                              | SE   | 95%CI           | P-value |
| Verbal Memory     | 53 | 50 | -1.99      | 2.34 | -6.63 ;<br>2.66 | .398    | -3.18                                                                  | 2.38 | -7.90 ;<br>1.54 | .185    | -2.34                                | 2.35 | -7.00 ;<br>2.32 | .322    |
| Digit Sequencing  | 53 | 50 | 0.11       | 0.90 | -1.67 ;<br>1.89 | .901    | 0.07                                                                   | 0.92 | -1.76 ;<br>1.89 | .944    | -0.02                                | 0.90 | -1.81 ;<br>1.77 | .983    |
| Verbal Fluency    | 53 | 50 | 1.23       | 1.86 | -2.46 ;<br>4.91 | .510    | 1.08                                                                   | 1.94 | -2.78 ;<br>4.94 | .580    | 1.17                                 | 1.88 | -2.56 ;<br>4.90 | .536    |
| Token Motor       | 53 | 49 | -0.42      | 2.95 | -6.28 ;<br>5.43 | .886    | -1.40                                                                  | 2.97 | -7.29 ;<br>4.50 | .638    | -0.62                                | 2.99 | -6.56 ;<br>5.31 | .835    |
| Symbol Coding     | 53 | 50 | -1.84      | 2.28 | -6.37 ;<br>2.68 | .421    | -1.89                                                                  | 2.37 | -6.60 ;<br>2.83 | .428    | -2.04                                | 2.30 | -6.60 ;<br>2.53 | .378    |
| Tower of London   | 53 | 50 | 0.40       | 0.82 | -1.23 ;<br>2.03 | .625    | 0.35                                                                   | 0.84 | -1.30 ;<br>2.01 | .672    | 0.23                                 | 0.82 | -1.40 ;<br>1.85 | .782    |
| z score composite | 53 | 49 | -0.03      | 0.29 | -0.60 ;<br>0.54 | .922    | -0.08                                                                  | 0.30 | -0.68 ;<br>0.52 | .798    | -0.07                                | 0.29 | -0.65 ;<br>0.50 | .800    |
| t score composite | 53 | 49 | -0.64      | 2.87 | -6.32 ;<br>5.05 | .825    | -1.33                                                                  | 3.02 | -7.32 ;<br>4.67 | .662    | -1.24                                | 2.88 | -6.96 ;<br>4.48 | .668    |

*Note.* R = antipsychotic responder; NR = antipsychotic non-responder; BACS = Brief Assessment of Cognition in Schizophrenia; CIs = confidence intervals.
